## RESEARCH ARTICLE

# The genetic impact of heat stress on the egg production of Thai native chickens (Pradu Hang dum)

Wipas Loengbudnark<sup>1</sup>, Vibuntita Chankitisakul<sup>1,2</sup>, Wuttigrai Boonkum<sup>1,2\*</sup>

**1** Department of Animal Science, Faculty of Agriculture, Khon Kaen University, Khon Kaen, Thailand, **2** The Research and Development Network Center of Animal Breeding and Omics, Khon Kaen University, Khon Kaen, Thailand

\* [wuttbo@kku.ac.th](mailto:wuttbo@kku.ac.th)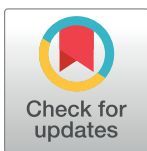

## Abstract

Sustainable poultry production in adverse weather conditions is a widely debated issue, which has led to research into the development of breeds of poultry that are genetically resistant to heat. This study aimed to investigate the effects of heat stress on the genetics of monthly egg production and examine the threshold point of heat stress for preventing thermal stress and its effects on chicken productivity. The data of 5,965 monthly egg production records of 629 Thai native Pradu Hang dum chickens were used for analysis in combination with the temperature-humidity index (THI) calculated by meteorological data near the testing station. The average THI throughout the year was 76.6, and the highest was 82. The THI data were subsequently used to find the threshold point of heat stress. The THI equation used in this study was chosen by its highest correlation (-0.306) between THI values and monthly egg production. At a THI of 74, the lowest -2 logL was found and was considered the threshold point of heat stress. This means that monthly egg production would start decreasing when the THI was 74. Heritability was  $0.15 \pm 0.03$ , and genetic and permanent environmental correlations were -0.29 and -0.48, respectively. The threshold point was used to estimate the estimated breeding values (EBVs) of the monthly egg production and heat stress individually, and EBVs were calculated into the selection index. The selection index values when the animal was selected for the replacement herd for all chickens (top 50%, 30%, 20%, and 10%) were 0.14, 0.90, 1.27, 1.53, and 1.91, respectively, and the genetic progress was 0.55, 0.60, 0.68, 0.75, and 0.77, respectively. This shows that the selection index values are lower if there are many selected animals. The recommendation for animal genetic selection is that the top 10% is appropriately because it seems to be most preferred. Therefore, using a selection index for high egg production and heat tolerance in Thai native chickens is possible to achieve genetic assessment in a large population.

## OPEN ACCESS

**Citation:** Loengbudnark W, Chankitisakul V, Boonkum W (2023) The genetic impact of heat stress on the egg production of Thai native chickens (Pradu Hang dum). PLoS ONE 18(2): e0281328. <https://doi.org/10.1371/journal.pone.0281328>

**Editor:** Aziz ur Rahman Muhammad, University of Agriculture Faisalabad, PAKISTAN

**Received:** November 6, 2022

**Accepted:** January 20, 2023

**Published:** February 3, 2023

**Copyright:** © 2023 Loengbudnark et al. This is an open access article distributed under the terms of the [Creative Commons Attribution License](https://creativecommons.org/licenses/by/4.0/), which permits unrestricted use, distribution, and reproduction in any medium, provided the original author and source are credited.

**Data Availability Statement:** The data for this study is publicly available from the DANS repository (<https://doi.org/10.17026/dans-x93-36wy>).

**Funding:** This study was funded by the Royal Golden Jubilee PhD Program (Grant number: PHD-0158-2561) and the Fundamental Fund of Khon Kaen University. The funders had no role in study design, data collection and analysis, decision to publish, or preparation of the manuscript.

**Competing interests:** The authors have declared that no competing interests exist.

## Introduction

The egg industry is one of the most crucial poultry industries that confront several challenges and obstacles worldwide. Therefore, there is an urgent need to keep improving hen's genetic resistance and productive performance [1]. Heat stress effects directly impact the reduction of egg production, egg quality, chicken feed intake, and increased mortality in poultry [2–6]. Chickens raised in tropical areas are more likely to be affected by heat stress than those in temperate regions due to high temperatures and humidity throughout the year. Heat stress occurs when there is an imbalance between an animal's body and ambient temperature, resulting in excessive heat load in the animal's body until they cannot cool the heat out of their body [7–9]. Heat stress affects chickens in many ways; for example, behavioral and physiological changes lead to discomfort and can affect productivity [10–12]. When the core body temperature reaches a critical point (116.8°F or 47°C), which is called the lethal upper temperature, chickens can die from heat penetration [9]. Chicken farmers suffer economic losses [13–15], especially decreased egg production, which directly affects farmers' incomes and is a major contributing factor to the global food shortage crisis [11, 16]. It was estimated by the world health organization (WHO) in 2021 [17] that as many as 8.9–10% of the world's population were expected to suffer from hunger and malnutrition. Meanwhile, in 2022, the report of Global Report on Food Crisis 2022 (GRFC 2022), using the Global Hunger Index (GHI) to comprehensively measure and track hunger globally and by region and country, reported that around 193 million people in 53 countries/territories were suffering from severe food shortages and malnutrition [16]. Moreover, low egg production directly impacts the number of day-old chicks and increases production costs [8]. Therefore, increasing egg production during heat stress is a critical challenge in improving the productivity and profitability of chickens [18, 19].

Generally, the optimum temperature for performance is between 19–22°C for laying hens [20]. If the environment has a higher temperature and humidity, the chicken will also have a higher body temperature. Hence, they need to find a way to cool their body temperature. In nature, chickens use methods of ventilation such as panting [21, 22], increasing wing spreading [9], finding shelter from the heat [23], and drinking more water [24] to produce effects of evaporative cooling. At the same time, there are many approaches for the prevention of heat stress that can help chickens with heat dissipation, such as environmental and management adjustments (using the evaporative cooling system, mounting ventilation equipment, spraying water), lowering stocking density, better housing [11, 25, 26], feeding and nutrition management (diurnal feeding patterns, use of dietary supplements and minerals, and coarse particle and wet feeding) [4, 27–31]. In addition to those physiological responses, animal genetic selection methods (heat tolerance genes, QTL technique, and crossbreeding mating system between high-producing and native breeds) are alternative choices for sustainable selection [5, 19, 32–35].

The methods mentioned above are successful and give good results in commercial chickens. However, these methods are not long-term solutions, and they are exorbitantly expensive. One option that can provide lasting results is the genetic selection method of egg production under heat stress using the genetic model combined with the temperature-humidity index (THI). This genetic approach is widely used in dairy cattle, beef cattle, and pigs [36–40]. At the same time, the use of THI has been reported to study the relationship between heat stress effects and productivity characteristics in broilers and laying hens [41–43]; therefore, its application in native chickens in term of productivity and genetics is possible. THI is a value indicating the merged effects of air temperature and humidity correlated with the levels of heat stress, and it has been developed to monitor and reduce heat stress-related losses [44].

Native chicken breeds are significant for rural economies in several countries and are considered a genetic resource for developing high-yielding species [45, 46]. Native chickens are an

inexpensive, high-quality protein source with good taste, good texture, and lower fat content, and are healthier than commercial broiler chickens [47, 48]. However, the research results on using quantitative genetics in the genetic selection of heat-tolerant native chickens are limited, and more information is needed.

Therefore, the objectives of this study were to investigate the effects of heat stress on phenotype and genetics for monthly egg production traits and to investigate the threshold point of heat stress in Thai native chickens.

## Materials and methods

### Data

The Institutional Animal Care approved all animals used in this study and the Use Committee of Khon Kaen University (No. IACUC-KKU-143/64). Data included 5,965 monthly egg production records of 629 Thai native chickens (Pradu Hang dum) obtained from the Network Center for Animal Breeding and Omics Research (NCAB), Faculty of Agriculture, Khon Kaen University. The experiment was conducted from March 2020 to February 2022. Pradu Hang dum is a Thai native chicken with black feathers, a black beak, and black shanks [49]. It has also been raised in all regions of Thailand for a long time.

The data were checked for normality by the Shapiro–Wilk test, for homogeneity of variance by the Levene’s test, and outlier data were eliminated before analysis. At birth, all chicks were leg tagged to assign their ID numbers and brooded for 4 weeks, then leg tags were removed, and wing tagging was used instead. They were vaccinated for infectious bronchitis, Newcastle disease, Fowlpox, and fowl cholera following the Network Center for Animal Breeding and Omics Research (NCAB) vaccination program. All chickens were reared in an open-housing system with an average of 12 h of natural light daily. They were fed with chicken commercial starter diet (19% crude protein, 2900 kcal ME/kg (ME = metabolizable energy)) for the brooding stage (first four weeks) and then changed to grower diet (15% crude protein, 2900 kcal ME/kg) from 4 weeks old to 20 weeks old with free access to fresh water. The chickens were morphologically considered (black feathers, a black beak, and black shanks) and selected at 12 weeks old of age, and chickens with disability were culled. At 20 weeks of age, the hens were moved to the battery cage (20 × 45 × 40 cm), and egg production was recorded starting when the chicken hen started laying the first egg (approximately 190 days of age) until 365 days of laying. During their laying period, hens were fed 100 g/d (17% crude protein, 2750 kcal ME/kg) for all assessments to fresh water.

Meteorological data, including daily air temperature ( $T$ ) and relative humidity ( $RH$ ), were obtained from the Thai Meteorological Department and recorded every 3 h at the Khon Kaen meteorological station, which is near NCAB (3 km from NCAB). The weather data were linked with the monthly egg production data and calculated into the THI according to four THI equations. After combining monthly egg production data and THI values, the statistical values were analyzed by Pearson correlation ( $r$ ) to consider the most appropriate THI equations for the dataset. The forms of the THI equations are shown as follows.

Eq (1) by the National Ocean and Atmospheric Administration [50] is as follows:

$$THI = (1.8 \times T_{avg} + 32) - (0.55 - 0.0055 \times RH_{Avg}) \times (1.8 \times T_{avg} - 26) \quad (1)$$

where  $T_{avg}$  is the average air temperature ( $^{\circ}\text{C}$ ) and  $RH_{Avg}$  is the average relative humidity (%).

Eq (2) by Tao and Xin [51] is as follows:

$$THI = 0.85(T_{max}) + 0.15(T_{min}) \quad (2)$$

Eq (3) by Zulovich and DeShazer [52] is as follows:

$$THI = 0.60(T_{max}) + 0.40(T_{min}) \quad (3)$$

where  $T_{max}$  is the maximum air temperature ( $^{\circ}\text{C}$ ) and  $T_{min}$  is the minimum air temperature ( $^{\circ}\text{C}$ ).

Eq (4) cited by Marai et al. [53] is as follows:

$$THI = db^{\circ}\text{C} - [(0.31 - 0.31RH)(db^{\circ}\text{C} - 14.4)] \quad (4)$$

where  $db^{\circ}\text{C}$  is the dry bulb temperature in degrees Celsius and  $RH$  is the relative humidity percentage.

## Climate conditions

The climate condition of the research area (Khon Kaen Province; northeastern Thailand) during March 2020 to Feb 2022 could be characterized as hot and humid year-round. It was found that the average air temperature was  $26.9^{\circ}\text{C}$ . The highest temperature was in April (summer season), and the lowest temperature was in January (winter season). The relative humidity exceeded 67% for the entire year. The average THI was 76.6; the highest THI (82) was in April through July, and the lowest THI (68) was in January and December (Table 1 and Fig 1).

## Genetic estimation

The repeatability test-day model was used to analyze the threshold point of heat stress, decrease in egg production according to THI level, estimated variance components, and genetic parameters (heritability, genetic correlation, and phenotypic correlation) using the Average Information Restricted Maximum Likelihood (AI-REML) algorithm [54]. The model is shown as follows:

$$y_{ijklm} = HG_{ij} + MIE_k + AFE_l + \alpha(THI) + a_{0m} + a_{1m}[f(THI)] + p_{0m} + p_{1m}[f(THI)] + e_{ijklm} \quad (5)$$

where  $y_{ijklm}$  is the observation value of monthly egg production in hatch and generation ( $HG$ ) class  $ij$ , months in egg ( $MIE$ ) class  $k$ , age at first egg ( $AFE$ ) covariate  $l$ , of animals  $m$ ;  $HG_{ij}$  is the fixed effect of hatch and generation;  $MIE_k$  is the fixed effect of months in egg;  $AFE_l$  is the effect of age at first egg;  $\alpha(THI)$  is the rate of decline of monthly egg production per a level of the temperature-humidity index (THI);  $a_{0m}$  is random additive genetic effects without consideration of heat stress of animal  $m$ ;  $p_{0m}$  is random permanent environmental effects without consideration of heat stress of animal  $m$ ;  $a_{1m}[f(THI)]$  and  $p_{1m}[f(THI)]$  are the random additive

**Table 1. Data structure for estimation of variance components for Thai native chickens.**

| Categories                               | N     | Mean | SD  | Max  | Min  |
|------------------------------------------|-------|------|-----|------|------|
| Animal with records (n)                  | 629   |      |     |      |      |
| Animal with pedigrees (n)                | 866   |      |     |      |      |
| Number of records (n)                    | 5,965 |      |     |      |      |
| Monthly egg production (eggs/month/bird) |       | 12   | 7   | 27   | 1    |
| Annual egg production (eggs/year/bird)   |       | 140  | 39  | 220  | 22   |
| Age at first egg (days)                  |       | 201  | 28  | 297  | 137  |
| Air temperature ( $^{\circ}\text{C}$ )   |       | 26.9 | 2.3 | 31.3 | 21.5 |
| Relative humidity (%)                    |       | 76.9 | 8.8 | 86.2 | 67.6 |
| Temperature-humidity index, THI          |       | 76.6 | 3.8 | 82   | 68   |

<https://doi.org/10.1371/journal.pone.0281328.t001>

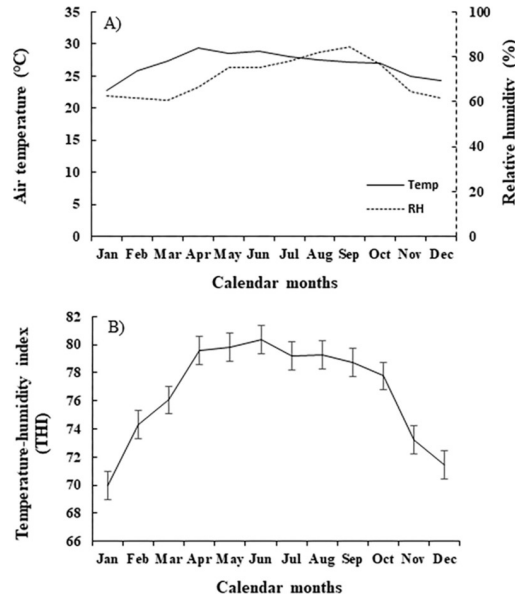

**Fig 1.** Average A) air temperature (—), relative humidity (----), and B) temperature-humidity index in Khon Kaen Province, Thailand, by calendar month during March 2020 to February 2022.

<https://doi.org/10.1371/journal.pone.0281328.g001>

genetic and permanent environmental effects of animal *m* under heat stress conditions; and  $e_{ijklm}$  is the random residual effects.

The heat stress function is shown as follows [44]:

$$f(THI) = \begin{cases} 0 & ; THI \leq THI_{threshold} \text{ (no heat stress)} \\ THI - THI_{threshold} & ; THI > THI_{threshold} \text{ (heat stress)} \end{cases} \quad (6)$$

The THI included in the repeatability test-day model was set at various critical values or threshold points. Different thresholds, at 70 (THI70), 72 (THI72), 74 (THI74), 76 (THI76), 78 (THI78), and 80 (THI80) of THI, were tested in the model. The best model was considered to come from the lowest minus twice the logarithm of the likelihood ( $-2\log L$ ) and the lowest Akaike information criterion (AIC).

Heritability ( $h^2$ ) was calculated as [44]:

$$h^2 = \frac{\sigma_{a0}^2 + \sigma_{a1}^2 + 2\sigma_{a01}}{\sigma_{a0}^2 + \sigma_{a1}^2 + 2\sigma_{a01} + \sigma_{p0}^2 + \sigma_{p1}^2 + 2\sigma_{p01} + \sigma_e^2} \quad (7)$$

Genetic correlations ( $r_g$ ) with and without consideration of heat stress effects of the additive genetic effects and correlations with and without consideration of heat stress effects of the permanent environmental correlations ( $r_p$ ) were calculated as follows [44]:

$$r_g = \frac{COV\sigma_{a0,a1}}{\sqrt{\sigma_{a0}^2 * \sigma_{a1}^2}} \quad (8)$$

$$r_p = \frac{COV\sigma_{p0,p1}}{\sqrt{\sigma_{p0}^2 * \sigma_{p1}^2}} \quad (9)$$

## Selection index

The selection index was calculated based on the estimated breeding values (*EBV*) for the traits, monthly egg production, and heat tolerance. The relative economic value ( $\vartheta$ ) of each trait was a proportion of the standardized economic value to the total economic importance [55]. The trait of monthly egg production was determined to be more economically important than heat tolerance because egg production is directly related to production cost and benefit. Although heat tolerance is still essential, heat tolerance can also affect productivity due to physiological mechanisms. Therefore, the relative economic value of heat tolerance will be slightly lower than that of monthly egg production, at 0.70 and 0.30, respectively.

The selection index was calculated using the following formula [55]:

$$I = (\vartheta_1 \times EBV_1) - (\vartheta_2 \times EBV_2) \quad (10)$$

where  $I$  is the selection index value,  $\vartheta_1 = 0.70$  and  $\vartheta_2 = 0.30$  are relative economic values for monthly egg production and heat tolerance, respectively, and  $EBV_1$  and  $EBV_2$  are estimated breeding values for the traits.

Genetic progress using the formula is as follows [55]:

$$\Delta G = h^2 \times SD \quad (11)$$

where  $\Delta G$  is genetic progress,  $h^2$  is heritability, and  $SD$  is the selection differential between before and after selection.

## Results

### Determination of the appropriate THI equation and heat-stress threshold

The THI equations in this study were chosen based on the highest correlation value between THI values and monthly egg production, as shown in Table 2. The results showed that THI Eq 1 of the National Ocean and Atmospheric Administration (1976) had a significant and high negative correlation (-0.306) ( $p < 0.05$ ) compared to the other THI equations; therefore, THI Eq 1 was used to estimate genetic parameters and to estimate breeding values for further selection index calculations. From Table 3, the lowest  $-2\log L$  and AIC criteria were found at a THI of 74, which means that a THI of 74 was the threshold point of heat stress in this study and marks the beginning of a decline in egg production of Thai native chickens. To expand the THI of 74 in the form of air temperature and relative humidity, it was found that air temperatures in the range of 25.1 to 25.9°C and relative humidity in the range of 60.0 to 68.6% are considered the period when Thai native chickens begin to experience heat stress. At the same time, egg production began to decline with a drop of 0.32 eggs/THI of 74. Additionally, at a THI of 80, the drop in egg production was approximately 2 times higher than the THI of 74 (-0.67 egg/THI).

**Table 2. Correlation and p value of four equations for calculating THI.**

| THI equations | Correlation (r) | p value |
|---------------|-----------------|---------|
| Equation1     | -0.306          | 0.025   |
| Equation1     | -0.228          | 0.032   |
| Equation1     | -0.234          | 0.029   |
| Equation1     | -0.281          | 0.030   |

<https://doi.org/10.1371/journal.pone.0281328.t002>

Table 3. Estimated variance components and genetic parameters for monthly egg production according to THI levels.

| Parameters                                                    | THI70     | THI72     | THI74            | THI76     | THI78     | THI80     |
|---------------------------------------------------------------|-----------|-----------|------------------|-----------|-----------|-----------|
| $\sigma_{a0}^2$                                               | 5.87      | 5.85      | <b>5.83</b>      | 5.80      | 5.80      | 5.80      |
| $\sigma_{a1}^2$                                               | 0.02      | 0.02      | <b>0.03</b>      | 0.10      | 0.23      | 0.41      |
| $\sigma_{a0,a1}$                                              | -0.10     | -0.10     | <b>-0.12</b>     | -0.23     | -0.36     | -0.49     |
| $\sigma_{p0}^2$                                               | 7.95      | 7.93      | <b>7.88</b>      | 7.87      | 7.87      | 7.87      |
| $\sigma_{p1}^2$                                               | 0.28      | 0.32      | <b>0.46</b>      | 1.84      | 4.14      | 6.36      |
| $\sigma_{p0,p1}$                                              | -0.72     | -0.77     | <b>-0.92</b>     | -1.95     | -2.96     | -4.12     |
| $\sigma_e^2$                                                  | 25.71     | 25.71     | <b>25.75</b>     | 25.90     | 26.00     | 26.22     |
| $\sigma_{total}^2$                                            | 38.19     | 38.09     | <b>37.87</b>     | 37.15     | 37.40     | 38.44     |
| $h^2(\pm SE)$                                                 | 0.15±0.02 | 0.15±0.02 | <b>0.15±0.03</b> | 0.15±0.03 | 0.14±0.04 | 0.14±0.04 |
| $r_g$                                                         | -0.29     | -0.29     | <b>-0.29</b>     | -0.30     | -0.31     | -0.32     |
| $r_p$                                                         | -0.48     | -0.48     | <b>-0.48</b>     | -0.51     | -0.52     | -0.58     |
| <b>Model statistic criterion</b>                              |           |           |                  |           |           |           |
| -2logL                                                        | 37414.42  | 37409.731 | <b>37404.949</b> | 37421.060 | 37421.060 | 37421.060 |
| AIC                                                           | 37428.42  | 37423.731 | <b>37418.949</b> | 37435.056 | 37435.056 | 37435.056 |
| <b>Rate of decline of egg production (egg/bird/THI level)</b> |           |           |                  |           |           |           |
| $\alpha(THI)$                                                 | 0         | 0         | <b>-0.32</b>     | -0.46     | -0.62     | -1.22     |

$\sigma_{a0}^2$  = additive genetic variance without consideration of heat stress;  $\sigma_{a1}^2$  = additive variance under heat stress conditions;  $\sigma_{a0,a1}$  = additive genetic covariance between effects with and without heat stress considered;  $\sigma_{p0}^2$  = permanent environmental variance without consideration of heat stress;  $\sigma_{p1}^2$  = permanent environmental variance under heat stress conditions;  $\sigma_{p0,p1}$  = permanent environmental covariance between effects with and without heat stress considered;  $\sigma_e^2$  = residual variance;  $\sigma_{total}^2$  = total variance;  $h^2(\pm SE)$  = heritability;  $r_g$  = genetic correlation;  $r_p$  = permanent environmental correlation; -2logL = minus twice the logarithm of the likelihood; AIC = Akaike information criterion;  $\alpha(THI)$  is the rate of decline of monthly egg production per a level of temperature-humidity index (THI).

<https://doi.org/10.1371/journal.pone.0281328.t003>

## Heat stress on variance components, heritability, and permanent environmental effects

The variance components and genetic parameters of the monthly egg production in Thai native chickens at various THIs are shown in Table 3. The additive genetic (5.80 to 5.87) and permanent environmental (7.87 to 7.95) variances without consideration of heat stress were not different in each THI value. In contrast, the additive genetic (0.02 to 0.41) and permanent environmental (0.28 to 6.36) variances under heat stress conditions were constant before the THI threshold, then increased after the THI threshold (THI of 74) and were many times greater when the THI was 80 (0.41 for additive genetic variance and 6.36 for permanent environmental variance). The estimates of heritability for monthly egg production ranged from 0.14 to 0.15. Moreover, the heritability values decreased with increasing THI.

## Heat stress on genetic and permanent environmental correlations

The genetic correlations with and without considering the heat stress effect ( $r_g$ ) at a THI of 74 showed a moderate negative correlation (-0.29) and were similar to other THI values and ranged from -0.29 to -0.32 (Table 3). These results can be described as high egg production having low heat tolerance. At the same time, the permanent environmental correlations with and without considering the heat stress effect ( $r_p$ ) at a THI of 74 were also negative (-0.48) and were similar to other THI values and ranged from -0.48 to -0.58.

## Selection index

The selection index (monthly egg number and heat tolerance) was calculated, and the average selection index values for all chickens and the top 50%, 30%, 20%, and 10% are presented in

**Fig 2.** The results indicated that the selection of native chickens that have good genetics of both high egg production and heat tolerance at the same time. The results also revealed that the higher the selection intensity, the higher the selection index, corresponding to genetic progress. The selection index values when the animal was selected for the replacement herd for all chickens (top 50%, 30%, 20%, and 10%) were 0.14, 0.90, 1.27, 1.53, and 1.91, respectively, and the genetic progress was 0.55, 0.60, 0.68, 0.75, and 0.77, respectively.

## Discussion

Heat stress is one of many factors affecting chicken productivity since it is induced by a negative balance between animal and environmental temperature, leading to unbalanced thermoregulation, their body's cooling mechanisms becoming overwhelmed, and they might experience heat stress. Exposure to high ambient temperatures can decrease feed intake, which is the starting point of heat stress's most detrimental effects on production and, consequently, the limitation of egg production due to insufficient nutrient supply [56]. At the same time, genetic improvement for high egg production can also lead to a genetic decline in animal thermotolerance due to the lack of consideration of the genetic improvement of both traits at the same time before.

### Threshold and egg production decline

This study showed that the threshold point of heat stress for monthly egg production in Thai native chickens (Pradu Hang dum) was at a THI of 74. In other words, egg production starts to decline if the air temperature was >25.9 degrees Celsius and the relative humidity was >68.6 percent. Kilic and Simsek [41], who used the THI equation by Zulovich and Deshazer [52], reported that when THI values increased from 25 to 29, egg production decreased by 25% in

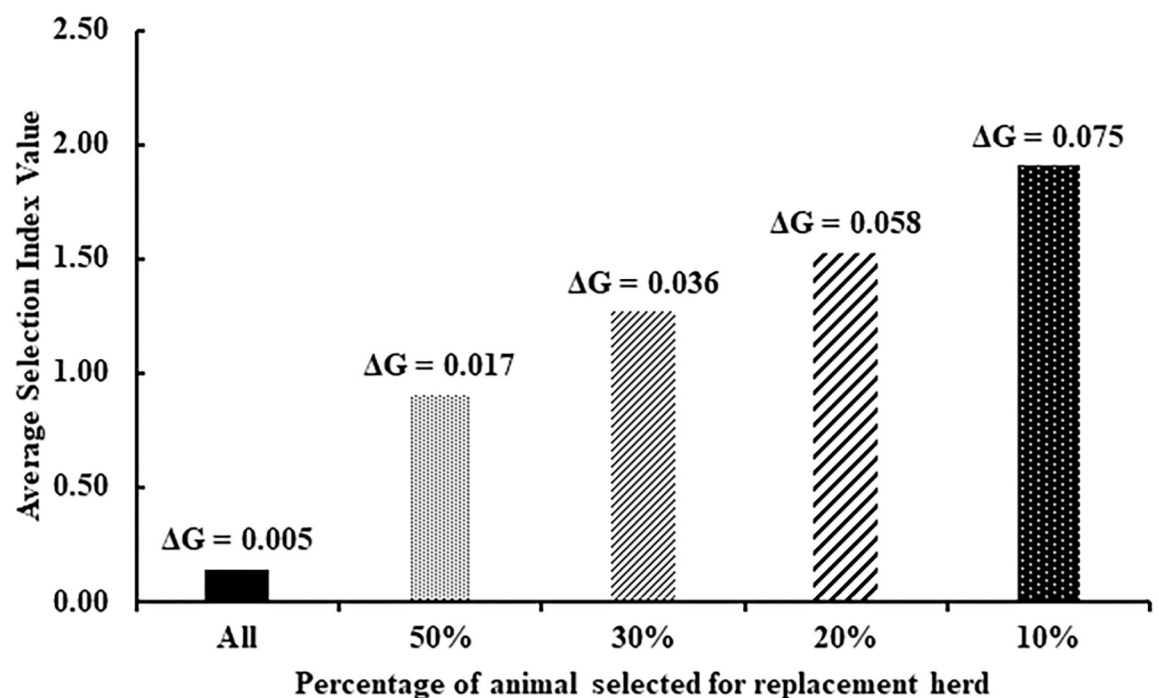

**Fig 2.** The selection index value (monthly egg number and heat tolerance) and genetic progress from all datasets and the top 50%, 30%, 20%, and 10% of the dataset in Pradu Hang dum chickens.

<https://doi.org/10.1371/journal.pone.0281328.g002>



laying hens. In addition, Celik et al. [57] recommended that chickens avoid temperatures above 24°C, as this is the starting point of heat stress. Some reports have shown a detrimental effect on poultry productivity when temperatures exceed 30°C [58, 59]. The reduction in productivity results from behavioral and physiological changes in pursuit of balance thermoregulation, such as decreased feed intake, reduced uptake of available nutrients, and decreased digestibility of different components of the diet [2, 3]. This result is consistent with the report of Kim et al. [60], who studied the impacts of relative humidity on laying performance using three separate groups of laying hens. Each group was exposed to different relative humidity levels, low (25%), medium (50%), and high (75%), with high ambient temperature (30°C). The results showed that although relative humidity does not directly affect egg production, it affects feed intake, which is directly related to nutrient requirements and consequently affects egg production. Mignon-Grasteau et al. [61] performed their meta-analysis study regarding robustness to chronic heat stress in laying hens. Sensitivity to heat stress of shell strength, daily feed intake, egg mass, and hen-day egg production seemed more sensitive than the other traits, as it dropped approximately 13.6% between thermoneutral (15 to 20°C) and heat stress (30 to 35°C). Moreover, Deng et al. [62] studied a 12-day heat stress period that caused a 28.8% decrease in egg production. Moreover, acute heat stress (exposure to heat stress (35 ± 1°C) with relative humidity (55 ± 5%) for six hours) had a negative impact on egg production and quality in four genetically diverse strains of Egypt. Egg production dropped 17.65% in Lohman Brown, 23.21% in Golden Sabathia, 15.15% in Fayoumi, and 28.57% in White Leghorn [63]. Star et al. [64] reported a reduction of 36.4% in egg production and 3.41% in egg weight in laying hens subjected to heat stress. Additionally, heat stress has been shown to cause a significant reduction in egg weight (3.24%), eggshell thickness (1.2%), eggshell weight (9.93%), and eggshell percent (0.66%) [65]. Mashaly et al. [2] reported a marked decrease in egg production (28.8%), feed intake (34.7%), and body weight (19.3%) in laying hens subjected to chronic heat stress for 5 weeks. The observed reduction in feed intake may be caused by the hens' attempt to maintain homeostasis by reducing their heat production [66]. Barrett et al. [5] found that heat stress lowered feed intake. Differences in animal breeds or genetic backgrounds and the quantity, severity, and duration of exposure to different heat stresses can explain the reported variation in the effects of heat stress. This could lead to the development of heat-tolerant poultry breeds specific to the area. In this study, the decline in egg production of Thai native chickens was 4.86% at a THI of 74 and 13.77% at a THI of 80, which was lower than previously mentioned. Important information for future genetic development is that chickens originated and were raised in tropical areas for a long time, like native chickens. Therefore, they are likely to better adapt to the environment than raise chickens from other sources in tropical regions [67, 68].

## Heritability

The heritability estimates of monthly egg production in this study ranged from 0.14 to 0.15. These estimates were similar to previous estimates reported by Tongsiri et al. [69] in Thai native chickens (Lueng Hang Kao Kabinburi) (0.15), Esfahan native chickens (0.16) [70], and Mazandaran native chickens (0.17) [71]. At the same time, the value from this study was different from many reported values, including in Horro chickens of Ethiopia (0.20 to 0.56) [72], in Korean Native Chickens (0.24 to 0.37) [73], and in Fayoumi chickens under conditions of heat stress (0.27 to 0.45) [19]. Yakubu et al. [74] also estimated a moderate  $h^2$  for Sasso egg production traits ( $h^2 = 0.33$ ) under tropical conditions.

One thing observed in this study is that heritability estimates tend to decrease with increasing THI values. The increase in THI values corresponds to an increase in additive genetic

variance and permanent environmental variance under heat stress conditions, especially the permanent environmental variance, which will increase many times as the THI value increases, resulting in a decrease in heritability estimates. Additive gene effects for heat stress are comparable to heat shock protein (HSP) genes, which encode proteins involved in the cellular stress response. These proteins are called heat shock proteins because they are induced by exposure to elevated temperatures. They also play a role in the immune system, helping to protect cells from stress and damage, and are essential for maintaining cellular homeostasis and protecting against stress-induced damage [75]. These reasons explain why the additive genes are higher during heat stress in animals. Meanwhile, the permanent environmental variance would refer to the variations in the effects of heat stress on a population caused by differences in the environmental conditions that the individuals in the population experience rather than genetic differences. Factors contributing to the permanent environmental variance of heat stress effects include differences in the ambient temperature, humidity, and other climatic conditions that individuals are exposed. Besides, the differences in the type and intensity of physical and behavioral activity might affect their ability to cope with heat stress [35, 38, 76]. These results are in accordance with Boonkum et al. [46], who reported changes in variances and heritability of growth after the THI threshold point, which studied Thai slow-growing chickens (Kai Shee and Kaimook e-san1). It also showed a rise in variance changes and a decline in heritability.

However, the estimated heritability in this study was low (0.14 to 0.15), suggesting that genetic selection of heat tolerance and high egg production in chickens using the traditional method can result in low selection accuracy and slow selection progress [77]. For this reason, a combination of methods should be used to increase the accuracy of selection. For example, marker-assisted selection (MAS) is used in terms of preselection, and then the selection index is used for genetic selection in the final steps.

### Genetic and permanent environmental correlations

The genetic correlations with and without considering the heat stress effect were moderate negative correlations ( $-0.29$ ). This indicated that selecting animal genetics for high egg production would lead to animal genetics with greater susceptibility to heat stress. Although the genetic correlation is negative, a low negative value may reveal the possibility of genetic improvement to enable chickens to have high egg production and heat tolerance using the selection index [44]. Another reason is that the genetic background of indigenous chickens is relatively heat-tolerant, resulting in less negative genetic correlation. Poultry has evolved to develop specific phenotypes that are useful for adapting to harsh environments wherever they live. Several phenotypes have been developed to mitigate heat stress effects, such as feather types, including naked neck, frizzle [78, 79], and plumage color [80, 81].

In addition, the permanent environmental correlations with and without considering the heat stress effect ( $r_p$ ) were also negative ( $-0.48$ ). These values indicated that managing the environment for high egg production in Thai native hens would increase heat stress in chicken hens. In addition, the permanent environmental correlations were approximately two times higher than the genetic ones, meaning that chicken hens that respond to heat stress were expressed mainly by the environment rather than genetics. For this reason, to have higher egg productivity in harsh climates, optimum environmental improvements coupled with genetic improvements are the approaches to achieve better results, for example, an adjusted environment in terms of animal house pattern, ventilation system, natural or artificial shading, feed and feeding, water consumption [6, 11, 26].

## Selection index

The selection index was calculated using EBVs of the traits (monthly egg production and heat tolerance) and economic values. Values from the selection index also allow for balanced animal genetic selection decisions. It ranks the animals according to the overall genetic value of the traits to be genetically improved [82]. Genetic improvement occurs when genetic merit is improved through selection. The improvement in genetic merit refers to the overall improvement in a flock brought about by selection for several traits that contribute to the flock's breeding objective. The present study presented the percentage of selection of animals for future replacement herds, which revealed that if many animals are selected, the values of the selection index will be lower as well. It is directly related to the increase in genetic progress [83]. On the other hand, selecting the animals too intensely (a small number of animals are selected) can result in higher inbreeding and decreased genetic variation [84]. Therefore, appropriate selection intensity or proportion matters to balance genetic improvement and inbreeding. The selection of the top 10% from the flock is preferable to other proportions since it is not too intense. As mentioned above, the genetic development of indigenous chickens to have great potential in heat tolerance and egg production can be achieved.

In conclusion, heat stress had a detrimental effect on both the reduction of egg production and the genetic decline of Thai native chickens. The impact of heat stress was evident at a THI of 74. In addition, selection for high egg production in native chickens would decrease heat tolerance in Thailand's hot and humid climatic conditions. Therefore, the use of selection indices by the top 10% of selected birds showed that the combined genetic selection for high egg production and heat tolerance is possible and easy to implement in the bird's genetic assessment of large populations.

## Supporting information

**S1 File.** The egg production database is available doi: [10.17026/dans-x93-36wy](https://doi.org/10.17026/dans-x93-36wy). (XLSX)

## Author Contributions

**Conceptualization:** Wipas Loengbudnark, Vibuntita Chankitisakul, Wuttigrai Boonkum.

**Data curation:** Wipas Loengbudnark, Vibuntita Chankitisakul, Wuttigrai Boonkum.

**Formal analysis:** Wipas Loengbudnark, Wuttigrai Boonkum.

**Funding acquisition:** Wuttigrai Boonkum.

**Investigation:** Vibuntita Chankitisakul, Wuttigrai Boonkum.

**Methodology:** Wipas Loengbudnark, Wuttigrai Boonkum.

**Project administration:** Wuttigrai Boonkum.

**Supervision:** Wuttigrai Boonkum.

**Validation:** Wipas Loengbudnark, Vibuntita Chankitisakul, Wuttigrai Boonkum.

**Visualization:** Vibuntita Chankitisakul, Wuttigrai Boonkum.

**Writing – original draft:** Wipas Loengbudnark, Vibuntita Chankitisakul, Wuttigrai Boonkum.

**Writing – review & editing:** Wipas Loengbudnark, Vibuntita Chankitisakul, Wuttigrai Boonkum.

## References

1. El-Sabroun K, Aggag S, Mishra B. Advanced Practical Strategies to Enhance Table Egg Production. *Scientifica*. 2022; 2022: 1393392. <https://doi.org/10.1155/2022/1393392> PMID: 36349300
2. Mashaly MM, Hendricks GL, Kalama MA, Gehad AE, Abass AO, Patterson PH. Effects of heat stress on production parameters and immune response of commercial laying hens. *Poult Sci*. 2004; 83(6): 889–894. <https://doi.org/10.1093/ps/83.6.889> PMID: 15206614
3. Allahverdi A, Feizi A, Takhtfooladi HA, Nikpiran A. Effects of heat stress on acid-base imbalance, plasma calcium concentration, egg production and egg quality in commercial layers. *Glob Vet*. 2013; 10(2): 203–207. <https://doi.org/10.5829/idosi.gv.2013.10.2.7286>
4. Zhang P, Yan T, Wang X, Kuang S, Xiao Y, Lu W, et al. Probiotic mixture ameliorates heat stress of laying hens by enhancing intestinal barrier function and improving gut microbiota. *Ital J Anim Sci*. 2016; 16(2): 1–9. <https://doi.org/10.1080/1828051X.2016.1264261>
5. Barrett NW, Rowland K, Schmidt CJ, Lamont SJ, Rothschild MF, Ashwell CM, et al. Effects of acute and chronic heat stress on the performance, egg quality, body temperature, and blood gas parameters of laying hens. *Poult Sci*. 2019; 98(12): 6684–6692. <https://doi.org/10.3382/ps/pez541> PMID: 31573614
6. Wasti S, Sah N, Mishra B. Impact of heat stress on poultry health and performances, and potential mitigation strategies. *Animals*. 2020; 10(8): 1266–1286. <https://doi.org/10.3390/ani10081266> PMID: 32722335
7. Renaudeau D, Collin A, Yahav S, de Basilio V, Gourdiere JL, Collier RJ. Adaptation to hot climate and strategies to alleviate heat stress in livestock production. *Animal*. 2012; 6(5): 707–728. <https://doi.org/10.1017/S1751731111002448> PMID: 22558920
8. Lara LJ, Rostagno MH. Impact of heat stress on poultry production. *Animals*. 2013; 3(2): 356–369. <https://doi.org/10.3390/ani3020356> PMID: 26487407
9. Scanes CG. *Sturkie's Avian Physiology*. 6th ed. USA: Academic press; 2015. Chapter 37, Regulation of body temperature: strategies and mechanisms; p. 869–905.
10. Oguntunji AO, Alabi OM. Influence of high environmental temperature on egg production and shell quality: a review. *Worlds Poult Sci J*. 2010; 66(4): 739–749. <https://doi.org/10.1017/S004393391000070X>
11. Pawar SS, Basavaraj S, Dhansing LV, Pandurang KN, Sahebrao KA, Vitthal NA, et al. Assessing and mitigating the impact of heat stress in poultry. *Adv Anim Vet Sci*. 2016; 4(6): 332–341. <https://doi.org/10.14737/journal.aavs/2016/4.6.332.341>
12. Awad EA, Najaa M, Zulaikha ZA, Zulkifli I, Soleimani AF. Effects of heat stress on growth performance, selected physiological and immunological parameters, caecal microflora, and meat quality in two broiler strains. *Asian-Aust J Anim Sci*. 2019; 33(5): 778–787. <https://doi.org/10.5713/ajas.19.0208> PMID: 31480196
13. St-Pierre NR, Cobanov B, Schnitkey G. Economic losses from heat stress by US Livestock Industries. *J Dairy Sci*. 2003; 86(Suppl): E52–E77. [https://doi.org/10.3168/jds.S0022-0302\(03\)74040-5](https://doi.org/10.3168/jds.S0022-0302(03)74040-5)
14. Nyoni N MB, Grab S, Archer ERM. Heat stress and chickens: climate risk effects on rural poultry farming in low-income countries. *Clim Dev*. 2019; 11(1): 83–90. <https://doi.org/10.1080/17565529.2018.1442792>
15. Goel A. Heat stress management in poultry. *J Anim Physiol Anim Nutr*. 2021; 105: 1136–1145. <https://doi.org/10.1111/jpn.13496> PMID: 33417275
16. FAO, Global Network Against Food Crises and Food Security Information Network. The 2022 Global Report on Food Crises (GRFC 2022). [cited 2022 Jul 1]. Available from: <https://www.fao.org/documents/card/en/c/cb9997en/>.
17. FAO, the State of Food Security and Nutrition in the World 2021. [cited 2022 Dec 28]. Available from: <https://www.fao.org/3/cc0639en/cc0639en.pdf>.
18. Mookprom S, Boonkum W, Kunhareang S, Siripanya S, Duangjinda M. Genetic evaluation of egg production curve in Thai native chickens by random regression and spline models. *Poult Sci*. 2016; 96(2): 274–281. <https://doi.org/10.3382/ps/pew326> PMID: 27665013
19. Radwan LM. Genetic improvement of egg laying traits in Fayoumi chickens bred under conditions of heat stress through selection and gene expression studies. *J Therm Biol*. 2020; 89: 102546. <https://doi.org/10.1016/j.jtherbio.2020.102546> PMID: 32364988
20. Charles DR. Responses to the thermal environment. In: Charles DA, Walker AW, editors. *Poultry environment problems, a guide to solutions*. Nottingham (UK): Nottingham University Press; 2002. p. 1–16.
21. Richards SA. The significance of changes in the temperature of the skin and body core of the chicken in the regulation of heat loss. *J Physiol*. 1971; 216(1): 1–10. <https://doi.org/10.1113/jphysiol.1971.sp009505> PMID: 5558352

22. Chowdhury VS, Tomonaga S, Nishimura S, Tabata S, Furuse M. Physiological and behavioral responses of young chicks to high ambient temperature. *J Poult Sci.* 2012; 49(3): 212–218. <https://doi.org/10.2141/jpsa.011071>
23. Rath PK, Behura NC, Sahoo SP, Panda P, Mandal KD, Panigrahi PN. Amelioration of heat stress for poultry welfare: a strategic approach. *Int J Livestock Res.* 2015; 5(3): 1–9. <https://doi.org/10.5455/ijlr.20150330093915>
24. Li M, Wu J, Chen Z. Effects of heat stress on the daily behavior of Wenchang chickens. *Braz J Poult Sci.* 2015; 17(4): 559–566. <https://doi.org/10.1590/1516-635X1704559-566>
25. Teeter RG, Belay T. Broiler management during acute heat stress. *Anim Feed Sci Technol.* 1996; 58: 127–142. [https://doi.org/10.1016/0377-8401\(95\)00879-9](https://doi.org/10.1016/0377-8401(95)00879-9)
26. Lin H, Jiao HC, Buyse J, Decuypere E. Strategies for preventing heat stress in poultry. *Worlds Poult Sci J.* 2006; 62(1): 71–86. <https://doi.org/10.1079/WPS200585>
27. Kucuk O, Sahin K, Sahin N, Gursu M, Gulcu F, Ozcelik M, et al. Egg production, egg quality, and lipid peroxidation status in laying hens maintained at a low ambient temperature (6 degrees C) and fed a vitamin C and vitamin E-supplemented diet. *Vet Med (Praha).* 2003; 48(1): 33–40. <https://doi.org/10.17221/5747-VETMED>
28. Syafwan S, Kwakkel RP, Verstegen MWA. Heat stress and feeding strategies in meat-type chickens. *Worlds Poult Sci J.* 2011; 67(4): 653–674. <https://doi.org/10.1017/S0043933911000742>
29. Wilkinson JM. Re-defining efficiency of feed use by livestock. *Animal.* 2011; 5(7): 1014–1022. <https://doi.org/10.1017/S175173111100005X> PMID: 22440097
30. Saeed M, Babazadeh D, Naveed M, Arain MA, Hassan FU, Chao S. Reconsidering betaine as a natural anti-heat stress agent in poultry industry: a review. *Trop Anim Health Prod.* 2017; 49: 1329–1338. <https://doi.org/10.1007/s11250-017-1355-z> PMID: 28733762
31. Abdel-Moneim AME, Shehata AM, Khidr RE, Paswan VK, Ibrahim NS, El-Ghoul AA, et al. Nutritional manipulation to combat heat stress in poultry—A comprehensive review. *J Therm Biol.* 2021; 98: 102915. <https://doi.org/10.1016/j.jtherbio.2021.102915> PMID: 34016342
32. Melesse A, Maak S, Von Lengerken G. Effect of long-term heat stress on egg quality traits of Ethiopian naked neck chickens and their F1 crosses with Lohmann White and New Hampshire chicken breeds. *Livest Res Rural Dev.* 2010; 22(4): 71.
33. Van Goor A, Bolek KJ, Ashwell CM, Persia ME, Rothschild MF, Schmidt CJ, et al. Identification of quantitative trait loci for body temperature, body weight, breast yield, and digestibility in an advanced intercross line of chickens under heat stress. *Genet Sel Evol.* 2015; 47: 96. <https://doi.org/10.1186/s12711-015-0176-7> PMID: 26681307
34. Duangjinda M, Tunim S, Duangdaen S, Boonkum W. Hsp70 genotypes and heat tolerance of commercial and native chickens reared in hot and humid conditions. *Braz J Poultry Sci.* 2017; 19(1): 7–18. <https://doi.org/10.1590/1806-9061-2016-0245>
35. Galal A, Radwan LM, Rezik HH, Ayoub H. Expression levels of HSP70 and CPT-1 in three local breeds of chickens reared under normal or heat stress conditions after the introduction of the naked neck gene. *J Therm Biol.* 2019; 80: 113–118. <https://doi.org/10.1016/j.jtherbio.2018.12.018> PMID: 30784474
36. Bohmanova J, Misztal I, Tsuruta S, Norman HD, Lawlor TJ. Short communication: Genotype by environment interaction due to heat stress. *J Dairy Sci.* 2008; 91(2): 840–846. <https://doi.org/10.3168/jds.2006-142> PMID: 18218772
37. Aguilar I, Misztal I, Tsuruta S. Genetic components of heat stress for dairy cattle with multiple lactations. *J Dairy Sci.* 2009; 92(11): 5702–5711. <https://doi.org/10.3168/jds.2008-1928> PMID: 19841230
38. Boonkum W, Misztal I, Duangjinda M, Pattarajinda V, Tumwasorn S, Sanpote J. Genetic effects of heat stress on milk yield of Thai Holstein crossbreds. *J Dairy Sci.* 2011; 94(1): 487–492. <https://doi.org/10.3168/jds.2010-3421> PMID: 21183060
39. Bradford HL, Fragomeni BO, Lourenco DAL, Misztal I. Genetic evaluations for growth heat tolerance in Angus beef cattle. *J Anim Sci.* 2016; 94(10): 4143–4150. <https://doi.org/10.2527/jas.2016-0707> PMID: 27898850
40. Fragomeni BO, Lourenco DAL, Tsuruta S, Gray K, Huang Y, Misztal I. Modeling response to heat stress in pigs from nucleus and commercial farms in different locations. *J Anim Sci.* 2016; 94(11): 4789–4798. <https://doi.org/10.2527/jas.2016-0536> PMID: 27898949
41. Kilic I, Simsek E. The effects of heat stress on egg production and quality of laying hens. *J Anim Vet Adv.* 2013; 12(1): 42–47. <https://doi.org/10.36478/java.2013.42.47>
42. Bayhan A, Karaman S. Effects of heat stress on egg yields and mortality rates of caged poultry houses. *Kafkas Univ Vet Fak Derg.* 2013; 19(5): 881–887. <https://doi.org/10.9775/kvfd.2013.9041>
43. Sohail MU, Hume ME, Byrd JA, Nisbet DJ, Ijaz A, Sohail A, et al. Effect of supplementation of prebiotic mannanoligosaccharides and probiotic mixture on growth performance of broilers subjected to chronic

- heat stress. *Poult Sci.* 2012; 91(9): 2235–2240. <https://doi.org/10.3382/ps.2012-02182> PMID: 22912458
44. Ravagnolo O, Misztal I, Hoogenboom G. Genetic component of heat stress in dairy cattle, development of heat index function. *J Dairy Sci.* 2000; 83: 2120–2125. [https://doi.org/10.3168/jds.S0022-0302\(00\)75094-6](https://doi.org/10.3168/jds.S0022-0302(00)75094-6) PMID: 11003246
  45. Padhi MK. Importance of indigenous breeds of chicken for rural economy and their improvements for higher production performance. *Scientifica.* 2016; 2016: 2604685. <https://doi.org/10.1155/2016/2604685> PMID: 27144053
  46. Boonkum W, Duangjinda M, Kananit S, Chankitisakul V, Kenchaiwong W. Genetic effect and growth curve parameter estimation under heat stress in slow-growing Thai native chickens. *Vet Sci.* 2021; 8(12): 297. <https://doi.org/10.3390/vetsci8120297> PMID: 34941825
  47. Jaturasitha S, Chaiwang N, Kreuzer M. Thai native chicken meat: an option to meet the demands for specific meat quality by certain groups of consumers; a review. *Animal Prod Sci.* 2016; 57(8): 1582–1587. <https://doi.org/10.1071/AN15646>
  48. Charoensin S, Laopaiboon B, Boonkum W, Phetcharaburanin J, Villareal MO, Isoda H, et al. Thai native chicken as a potential functional meat source rich in anserine, anserine/carnosine, and antioxidant substances. *Animals.* 2021; 11(3): 902. <https://doi.org/10.3390/ani11030902> PMID: 33809894
  49. Dorji N, Daungjinda M, Phasuk Y. Genetic characterization of Thai indigenous chickens compared with commercial lines. *Trop Anim Health Prod.* 2011; 43: 779–785. <https://doi.org/10.1007/s11250-010-9763-3> PMID: 21153563
  50. National Oceanic and Atmospheric Administration. Livestock Hot Weather Stress. Operations Manual Letter C-31-76, Department of Commerce, NOAA, National Weather Service Central Region, Kansas City; 1976.
  51. Tao X, Xin H. Acute synergistic effects of air temperature, humidity, and velocity on homeostasis of market-size broilers. *Transactions of the ASAE.* 2003; 46(2): 491–497. <https://doi.org/10.13031/2013.12971>
  52. Zulovich JM, DeShazer JA. Estimating egg production declines at high environmental temperatures and humidity. *ASAE.* 1990;90–4021.
  53. Marai IFM, Ayyat MS, Abd El-Monem UM. Growth performance and reproductive traits at first parity of New Zealand white female rabbits as affected by heat stress and its alleviation, under Egyptian conditions. *Trop Anim Health Prod.* 2001; 33(6): 451–462. <https://doi.org/10.1023/a:1012772311177> PMID: 11770200
  54. Misztal I, Tsuruta S, Lourenco D, Aguilar I, Legarra A, Vitezica Z. Manual for BLUPF90 Family of Programs. Available online: [http://nce.ads.uga.edu/wiki/lib/exe/fetch.php?media=blupf90\\_all2.pdf](http://nce.ads.uga.edu/wiki/lib/exe/fetch.php?media=blupf90_all2.pdf) (accessed on 9 August 2019).
  55. Hazel LN. The genetic basis for constructing selection indexes. *Genetics.* 1943; 28(6): 476–490. <https://doi.org/10.1093/genetics/28.6.476> PMID: 17247099
  56. Das SK. Impact of climate change (heat stress) on livestock: adaptation and mitigation strategies for sustainable production. *Agric Rev.* 2018; 39: 130–136. <https://doi.org/10.18805/ag.R-1777>
  57. Celik LB, Tekeli A, Ozturkcan O. Effect of supplemental L-carnitine in drinking water on performance and egg quality of laying hens exposed to a high ambient temperature. *J Anim Physiol Anim Nut.* 2004; 88(5–6): 229–233. <https://doi.org/10.1111/j.1439-0396.2004.00477.x> PMID: 15189428
  58. Al-Saffar AA, Rose SP. Ambient temperature and the egg laying characteristics of the laying fowl. *Worlds Poult Sci J.* 2002; 58(3): 317–331. <https://doi.org/10.1079/WPS20020025>
  59. Tan GY, Yang L, Fu YQ, Feng JH, Zhang MH. Effects of different acute high ambient temperatures on functions of hepatic mitochondrial respiration, antioxidative enzymes, and oxidative injury in broiler chickens. *Poult Sci.* 2010; 89(1): 115–122. <https://doi.org/10.3382/ps.2009-00318> PMID: 20008809
  60. Kim DH, Lee YK, Lee SD, Lee KW. Impact of relative humidity on the laying performance, egg quality, and physiological stress responses of laying hens exposed to high ambient temperature. *J Therm Biol.* 2022; 103: 103167. <https://doi.org/10.1016/j.jtherbio.2021.103167> PMID: 35027187
  61. Mignon-Grasteau S, Moreri U, Narcy A, Rousseau X, Rodenburg TB, Tixier-Boichard M, et al. Robustness to chronic heat stress in laying hens: a meta-analysis. *Poult Sci.* 2015; 94(4): 586–600. <https://doi.org/10.3382/ps/pev028> PMID: 25717084
  62. Deng W, Dong XF, Tong JM, Zhang Q. The probiotic *Bacillus licheniformis* ameliorates heat stress-induced impairment of egg production, gut morphology, and intestinal mucosal immunity in laying hens. *Poult Sci.* 2012; 91(3): 575–582. <https://doi.org/10.3382/ps.2010-01293> PMID: 22334732
  63. Ghoname M, Elnaggar A, Hassan S, Habashy W. Effect of acute heat stress on production performance and egg quality in four strains of chickens. *S Afr J Anim Sci.* 2022; 52(2): 168–176.

64. Star L, Juul-Madsen HR, Decuypere E, Nieuwland MG, de Vries Reilingh G, van den Brand H, et al. Effect of early life thermal conditioning and immune challenge on thermotolerance and humoral immune competence in adult laying hens. *Poult Sci.* 2009; 88(11): 2253–2261. <https://doi.org/10.3382/ps.2008-00373> PMID: 19834073
65. Ebeid TA, Suzuki T, Sugiyama T. High temperature influences eggshell quality and calbindin-D28k localization of eggshell gland and all intestinal segments of laying hens. *Poult Sci.* 2012; 91(9): 2282–2287. <https://doi.org/10.3382/ps.2011-01898> PMID: 22912464
66. Etches RJ, John TM, Verrinder Gibbins AM. Behavioural, physiological, neuroendocrine and molecular responses to heat stress. In: Dagher NJ, editor. *Poultry Production in Hot Climates*. 2nd ed. Wallingford (UK): CAB International; 2008. p. 48–79.
67. Nanaei HA, Kharrati-Koopae H, Esmailzadeh A. Genetic diversity and signatures of selection for heat tolerance and immune response in Iranian native chickens. *BMC Genomics.* 2022; 23:224. <https://doi.org/10.1186/s12864-022-08434-7> PMID: 35317755
68. Andersson L. Domestic animals as models for biomedical research. *Ups J Med Sci.* 2016; 121(1): 1–11. <https://doi.org/10.3109/03009734.2015.1091522> PMID: 26479863
69. Tongsiri S, Jeyaruban GM, Hermes S, van der Werf JHJ, Chormai T. Genetic parameters and inbreeding effects for production traits of Thai native chickens. *Asian-Aust J Anim Sci.* 2019; 32(7): 930–938. <https://doi.org/10.5713/ajas.18.0690> PMID: 30744369
70. Zonuz AY, Alijani S, Mohammadi H, Rafat A, Daghigh Kia H. Estimation of genetic parameters for productive and reproductive traits in Esfahan native chickens. *J Livest Sci Technol.* 2013; 1(1): 36–40.
71. Niknafs S, Nejati-Javaremi A, Mehrabani-Yeganeh H, Fatemi SA. Estimation of genetic parameters for body weight and egg production traits in Mazandaran native chicken. *Trop Anim Health Prod.* 2012; 44: 1437–1443. <https://doi.org/10.1007/s11250-012-0084-6> PMID: 22286525
72. Dana N, vander Waaij EH, van Arendonk JAM. Genetic and phenotypic parameter estimates for body weights and egg production in Horro chicken of Ethiopia. *Trop Anim Health Prod.* 2011; 43: 21–28. <https://doi.org/10.1007/s11250-010-9649-4> PMID: 20625931
73. Sang BD, Kong HS, Kim HK, Choi CH, Kim SD, Cho YM, et al. Estimation of genetic parameters for economic traits in Korean native chickens. *Asian-Aust J Anim Sci.* 2006; 19(3): 319–323. <https://doi.org/10.5713/ajas.2006.319>
74. Yakubu A, Dodo IB, Abdulkadiri HS, Oluremi OA. Estimates of repeatability and heritability of egg number in Sasso hens in a tropical environment. *J Genet Genom.* 2017; 1(2): 106–109.
75. Cedraz H, Gromboni JGG, Garcia AAP, Farias Filho RV, Souza TM, De Oliveira ER, et al. Heat stress induces expression of HSP genes in genetically divergent chickens. *PLoS ONE.* 2017; 12(10): e0186083. <https://doi.org/10.1371/journal.pone.0186083> PMID: 29020081
76. Pech-Waffenschmidt V, Bogin E, Avidar Y, Horst P. Metabolic and biochemical changes during heat stress in relation to the feathering degree of the domestic hen. *Avian Pathol.* 1995; 24: 33–44. <https://doi.org/10.1080/03079459508419047> PMID: 18645764
77. Falconer DS. *Introduction to quantitative genetics*. 3rd ed. Essex (UK): Harlow Longman Sci Tech; 1989.
78. Yalcin S, Testik A, Ozkan S, Settari P, Celen F, Cahaner A. Performance of naked neck and normal broilers in hot, warm, and temperate climates. *Poult Sci.* 1997; 76(7): 930–937. <https://doi.org/10.1093/ps/76.7.930> PMID: 9200226
79. Fathi MM, Galal A, El-Safty S, Mahrous M. Naked neck and frizzle genes for improving chickens raised under high ambient temperature: I. Growth performance and egg production. *World's Poult Sci J.* 2013; 69(4): 813–832. <https://doi.org/10.1017/S0043933913000834>
80. Diaz-Real J, Kim SY, Velando A. Plumage colour and the expression of stress-related genes in gull chicks. *J Avian Biol.* 2017; 48: 1216–1225. <https://doi.org/10.1111/jav.01460>
81. Jiang RS, Xia WT, Chen XY, Geng ZY, Hu ZY. Density of contour feathers and heat tolerance in chickens. *J Appl Anim Res.* 2010; 38: 253–255. <https://doi.org/10.1080/09712119.2010.10539521>
82. Cole JB, VanRaden PM. Symposium review: Possibilities in an age of genomics: The future of selection indices. *J Dairy Sci.* 2018; 101(4): 3686–3701. <https://doi.org/10.3168/jds.2017-13335> PMID: 29103719
83. Khazraji WJM, AL-Khuzai HM, AL-Shaikh MA. Effect of selection intensity on the estimation of correlated and direct genetic response depending on milk production in Holstein Friesian cows. *Plant Arch.* 2020; 20(1): 803–806.
84. Weigel KA. Controlling Inbreeding in Modern Breeding Programs. *J Dairy Sci.* 2001; 84(Suppl): E177–E184. [https://doi.org/10.3168/jds.S0022-0302\(01\)70213-5](https://doi.org/10.3168/jds.S0022-0302(01)70213-5)
